# Supplementary material
Source: Springer Nature journal article supplement (https://www.springermedizin.de/resource/supplementary/13054_2012_898_MOESM4_ESM.pdf/9709288)

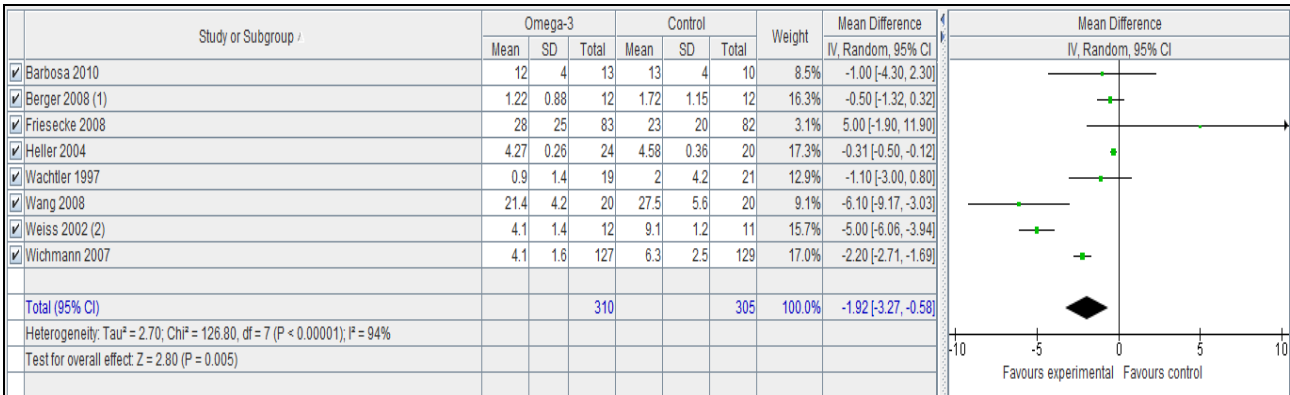

Supplement: MOESM4 [file 9709288]
